# Supplementary material for: Signature of van der Waals interactions in the cumulant density matrix
Source: Royal Society of Chemistry journal article supplement (doi:10.1039/c9cp03361k), 2019-01-01
Supplement: c9cp03361k1.pdf [file c9cp03361k1.pdf]

# Supporting Information: Signature of van der Waals Interactions in the Cumulant Density Matrix

Olivia Werba, Alexandra Raeber, Kade Head-Marsden, and David A. Mazziotti\*

*Department of Chemistry and The James Franck Institute, University of Chicago, Chicago,  
IL 60637*

E-mail: [damazz@uchicago.edu](mailto:damaz@uchicago.edu)

The square of the Frobenius norm as a function of distance for discussed dimer systems are provided in Tables S1 and S2, while the square of the Frobenius norm for the asymmetric molecules are in Table S3, respectively. Cartesian coordinates of the molecules in Tables 1 and 2 at 6 Å separation are given in Tables S4 through S13. All distances are in Angstroms.

**Table S1: Square of the Frobenius norm for different dimer systems as a function of the separation between the monomers, which is listed in Angstroms.**

| Separation (Å) | F <sub>2</sub> | NH <sub>3</sub> | BH <sub>3</sub> | CH <sub>4</sub> |
|----------------|----------------|-----------------|-----------------|-----------------|
| 2              | 586.745722625  | -               | -               | -               |
| 2.5            | 586.643867962  | -               | -               | -               |
| 3              | 586.624863028  | -               | -               | -               |
| 3.5            | 586.618125802  | 171.476081327   | -               | -               |
| 4              | 586.61586214   | 171.496740533   | 106.105170234   | 169.321419337   |
| 4.5            | 586.614888941  | 171.509105851   | 106.110450095   | 169.341382111   |
| 5              | 586.614388307  | 171.514212533   | 106.11318198    | 169.339463286   |
| 5.5            | 586.614111993  | 171.515968908   | 106.11447768    | 169.344806386   |
| 6              | 586.613950251  | 171.516655864   | 106.115065952   | 169.343988199   |
| 6.5            | 586.613851331  | 171.517042796   | 106.115351539   | 169.346518079   |
| 7              | 586.613788546  | 171.517306611   | 106.115508813   | 169.345542085   |
| 7.5            | 586.613747409  | 171.517505145   | 106.115604242   | 169.345290688   |
| 8              | 586.613719705  | 171.517660585   | 106.11566534    | 169.348263807   |
| 8.5            | 586.613700592  | 171.517785047   | 106.115705782   | 169.345552341   |
| 9              | 586.613687121  | 171.517886395   | 106.115733256   | 169.349250224   |
| 9.5            | 586.613677446  | 171.517970026   | 106.115752344   | 169.346497184   |
| 10             | 586.613670377  | 171.518039795   | 106.115765873   | 169.350048923   |
| 10.5           | 586.613665133  | 171.518098535   | 106.115775635   | 169.345757412   |
| 11             | 586.613661188  | 171.518148379   | 106.115782794   | 169.348063419   |
| 11.5           | 586.613658182  | 171.518190973   | 106.115788121   | 169.346195519   |
| 12             | 586.613655866  | 171.518227598   | 106.115792138   | 169.346922789   |
| 12.5           | 586.613654061  | 171.518259268   | 106.115795205   | 169.34980696    |
| 13             | 586.61365264   | 171.518286794   | 106.115797573   | 169.345811889   |
| 13.5           | 586.613651513  | 171.518310835   | 106.11579942    | 169.345848706   |
| 14             | 586.61365061   | 171.518331923   | 106.115800875   | 169.351574146   |
| 14.5           | 586.613649881  | 171.518350497   | 106.115802031   | 169.34666408    |
| 15             | 586.613649288  | 171.51836692    | 106.115802957   | 169.350516505   |
| 15.5           | 586.613648802  | 171.518381494   | 106.115803705   | 169.345870982   |
| 16             | 586.613648402  | 171.51839447    | 106.115804313   | 169.351472796   |
| 16.5           | 586.61364807   | 171.518406062   | 106.11580481    | 169.349000725   |
| 17             | 586.613647792  | 171.518416447   | 106.11580522    | 169.347611997   |
| 17.5           | 586.613647559  | 171.518425779   | 106.11580556    | 169.34588283    |
| 18             | 586.613647362  | 171.518434187   | 106.115805843   | 169.35146145    |
| 18.5           | 586.613647195  | 171.518441783   | 106.11580608    | 169.345886692   |
| 19             | 586.613647053  | 171.518448662   | 106.11580628    | 169.345888281   |
| 19.5           | 586.61364693   | 171.518454905   | 106.115806449   | 169.360094861   |
| 20             | 586.613646826  | 171.518460585   | 106.115806592   | 169.349739106   |

**Table S2: Square of the Frobenius norm for different dimer systems as a function of the separation between the monomers, which is listed in Angstroms.**

| Separation (Å) | Ar            | Be            | CO <sub>2</sub> | SO <sub>2</sub> |
|----------------|---------------|---------------|-----------------|-----------------|
| 4              | 597.224961931 | 20.4782061546 | 882.225573458   | 1907.16831281   |
| 4.5            | 597.230284365 | 20.4554364036 | 882.24811541    | 1907.23403537   |
| 5              | 597.233060514 | 20.4443639529 | 882.258704662   | 1907.26889574   |
| 5.5            | 597.234494191 | 20.4390910111 | 882.264094491   | 1907.28619804   |
| 6              | 597.235236453 | 20.4364155361 | 882.267055457   | 1907.29491803   |
| 6.5            | 597.235633631 | 20.4349180669 | 882.268799996   | 1907.29948721   |
| 7              | 597.235861109 | 20.4340156669 | 882.269882599   | 1907.30193029   |
| 7.5            | 597.235997534 | 20.4334666136 | 882.270579978   | 1907.30321647   |
| 8              | 597.236081836 | 20.433135035  | 882.27104291    | 1907.30385575   |
| 8.5            | 597.236135679 | 20.4329320086 | 882.271358283   | 1907.30412882   |
| 9              | 597.236171232 | 20.4328041117 | 882.271578092   | 1907.30419484   |
| 9.5            | 597.236195333 | 20.432719602  | 882.271734434   | 1907.30414575   |
| 10             | 597.236211995 | 20.4326618443 | 882.271847675   | 1907.30403522   |
| 10.5           | 597.236223701 | 20.432621388  | 882.271931046   | 1907.30389473   |
| 11             | 597.236232054 | 20.4325925008 | 882.271993339   | 1907.30374273   |
| 11.5           | 597.236238105 | 20.4325715396 | 882.272040512   | 1907.30347014   |
| 12             | 597.236242548 | 20.4325561114 | 882.272076676   | 1907.30344307   |
| 12.5           | 597.236245857 | 20.4325446078 | 882.272104711   | 1907.30330267   |
| 13             | 597.23624835  | 20.4325359279 | 882.272126671   | 1907.30317293   |
| 13.5           | 597.236250246 | 20.4325293063 | 882.272144037   | 1907.30305337   |
| 14             | 597.236251708 | 20.4325242037 | 882.272157891   | 1907.30294385   |
| 14.5           | 597.236252842 | 20.4325202345 | 882.272169034   | 1907.30284391   |
| 15             | 597.236253731 | 20.4325171198 | 882.272178064   | 1907.30275293   |
| 15.5           | 597.236254435 | 20.4325146557 | 882.272185436   | 1907.30267019   |
| 16             | 597.236254997 | 20.4325126913 | 882.272191492   | 1907.302595     |
| 16.5           | 597.236255447 | 20.4325111142 | 882.2721965     | 1907.30252665   |
| 17             | 597.236255809 | 20.4325098394 | 882.272200664   | 1907.30246449   |
| 17.5           | 597.236256107 | 20.4325088026 | 882.272204146   | 1907.30240792   |
| 18             | 597.236256346 | 20.4325079541 | 882.272207073   | 1907.30301815   |
| 18.5           | 597.236256547 | 20.432507256  | 882.272209544   | 1907.30230941   |
| 19             | 597.236256708 | 20.4325066787 | 882.272211642   | 1907.30226651   |
| 19.5           | 597.236256845 | 20.4325061986 | 882.27221343    | 1907.30288495   |
| 20             | 597.236256957 | 20.4325057977 | 882.272214959   | 1907.30219138   |

**Table S3:** Square of the Frobenius norm for asymmetric two-molecule systems as a function of their separation, which is provided in Angstroms.

| Separation (Å) | Ar-CO <sub>2</sub> | Ar-SO <sub>2</sub> |
|----------------|--------------------|--------------------|
| 5.5            | 734.172999621      | 1161.62212281      |
| 6              | 734.173279058      | 1161.62249637      |
| 6.5            | 734.173421869      | 1161.62268397      |
| 7              | 734.173503304      | 1161.62279002      |
| 7.5            | 734.173552192      | 1161.62285348      |
| 8              | 734.173582623      | 1161.62289291      |
| 8.5            | 734.173602153      | 1161.62291819      |
| 9              | 734.173615027      | 1161.62293485      |
| 9.5            | 734.173623718      | 1161.62294608      |
| 10             | 734.17362971       | 1161.62295383      |
| 10.5           | 734.17363392       | 1161.62295926      |
| 11             | 734.173636928      | 1161.62296315      |
| 11.5           | 734.173639112      | 1161.62296597      |
| 12             | 734.17364072       | 1161.62296805      |
| 12.5           | 734.173641919      | 1161.62296959      |
| 13             | 734.173642824      | 1161.62297076      |
| 13.5           | 734.173643514      | 1161.62297165      |
| 14             | 734.173644046      | 1161.62297234      |
| 14.5           | 734.173644461      | 1161.62297288      |
| 15             | 734.173644785      | 1161.6229733       |
| 15.5           | 734.173645042      | 1161.62297363      |
| 16             | 734.173645247      | 1161.62297389      |
| 16.5           | 734.173645412      | 1161.6229741       |
| 17             | 734.173645545      | 1161.62297428      |
| 17.5           | 734.173645653      | 1161.62297442      |
| 18             | 734.173645742      | 1161.62297453      |
| 18.5           | 734.173645815      | 1161.62297462      |
| 19             | 734.173645875      | 1161.6229747       |
| 19.5           | 734.173645925      | 1161.62297477      |
| 20             | 734.173645967      | 1161.62297482      |

**Table S4:** Geometry for F<sub>2</sub> dimer at 6 Å

| Atom | x   | y   | z      |
|------|-----|-----|--------|
| F    | 0.0 | 0.0 | 1.4119 |
| F    | 0.0 | 0.0 | 0.0    |
| F    | 0.0 | 0.0 | 6.0    |
| F    | 6.0 | 0.0 | 4.5881 |

**Table S5: Geometry for Ar-CO<sub>2</sub> at 6 Å**

| Atom | x   | y   | z       |
|------|-----|-----|---------|
| Ar   | 0.0 | 0.0 | 0.0     |
| C    | 6.0 | 0.0 | 0.0     |
| O    | 6.0 | 0.0 | 1.1621  |
| O    | 6.0 | 0.0 | -1.1621 |

**Table S6: Geometry for Ar-SO<sub>2</sub> at 6 Å**

| Atom | x   | y       | z     |
|------|-----|---------|-------|
| Ar   | 0.0 | 0.0     | 0.0   |
| S    | 6.0 | 0.0     | 0.0   |
| O    | 6.0 | 1.2371  | .7215 |
| O    | 6.0 | -1.2371 | .7215 |

**Table S7: Geometry for the BH<sub>3</sub> dimer at 6 Å**

| Atom | x       | y       | z     |
|------|---------|---------|-------|
| H    | 0.0     | -1.1900 | 0.0   |
| H    | 1.0306  | .5950   | 0.0   |
| H    | -1.0306 | .5950   | .7215 |
| B    | 0.0     | 0.0     | 0.0   |
| B    | 0.0     | 0.0     | 6.0   |
| H    | 6.0     | 1.1900  | 6.0   |
| H    | 1.0306  | -.5950  | 6.0   |
| H    | -1.0306 | -.5950  | 6.0   |

**Table S8: Geometry for the Ar dimer at 6 Å**

| Atom | x   | y   | z   |
|------|-----|-----|-----|
| Ar   | 0.0 | 0.0 | 0.0 |
| Ar   | 0.0 | 0.0 | 6.0 |

**Table S9: Geometry for the CH<sub>4</sub> dimer at 6 Å**

| Atom | x    | y     | z     |
|------|------|-------|-------|
| H    | 0.0  | 0.0   | 1.1   |
| H    | .898 | 0.0   | -.634 |
| H    | .898 | 0.0   | -.634 |
| H    | 0.0  | -.898 | -.634 |
| C    | 0.0  | 0.0   | 0.0   |
| C    | 0.0  | 0.0   | 6.0   |
| H    | .898 | 0.0   | 6.634 |
| H    | 0.0  | .898  | 6.634 |
| H    | 0.0  | -.898 | 6.634 |
| H    | 0.0  | 0.0   | 4.9   |

**Table S10: Geometry for NH<sub>3</sub> at 6 Å**

| Atom | x      | y      | z      |
|------|--------|--------|--------|
| H    | 0.0    | 0.0    | 0.0    |
| H    | 0.0    | -.9377 | -.3816 |
| H    | .8121  | .4689  | -.3816 |
| N    | -.8121 | .4689  | -.3816 |
| N    | 0.0    | 0.0    | 6.3816 |
| H    | 0.0    | 0.9377 | 6.3816 |
| H    | -.8121 | -.4689 | 6.3816 |
| H    | .8121  | -.4689 | 6.3816 |

**Table S11: Geometry for the Be dimer at 6 Å**

| Atom | x   | y   | z   |
|------|-----|-----|-----|
| Be   | 0.0 | 0.0 | 0.0 |
| Be   | 0.0 | 0.0 | 6.0 |

**Table S12: Geometry for CO<sub>2</sub> dimer at 6 Å**

| Atom | x   | y   | z       |
|------|-----|-----|---------|
| C    | 0.0 | 0.0 | 0.0     |
| O    | 0.0 | 0.0 | 1.1621  |
| O    | 0.0 | 0.0 | -1.1621 |
| C    | 6.0 | 0.0 | 0.0     |
| O    | 6.0 | 0.0 | 1.1621  |
| O    | 6.0 | 0.0 | -1.1621 |

**Table S13: Geometry for SO<sub>2</sub> dimer at 6 Å**

| Atom | x   | y       | z      |
|------|-----|---------|--------|
| S    | 0.0 | 0.0     | 0.0    |
| O    | 0.0 | -1.2371 | -.7215 |
| O    | 0.0 | 1.2371  | .7215  |
| S    | 6.0 | 0.0     | 0.0    |
| O    | 6.0 | -1.2371 | -.7215 |
| O    | 6.0 | 1.2371  | .7215  |
